# Supplementary material
Source: Research Square preprint supplement (doi:10.21203/rs.3.rs-9862747/v1)
Supplement: Supplementary file 1 [file 10fcd5282d423140e0c96900.docx]

**Questionnaire on the application of generative AI among postgraduate students**

Please read the following four instructions carefully before filling out the questionnaire:

(1) Generative AI refers to artificial intelligence technology that can independently create new content, such as DeepSeek, ChatGPT, Ernie Bot, etc.

(2) All the following questions are required and must be completed.

(3) All multiple-choice questions are single-choice unless multiple selections are explicitly allowed.

(4) This survey is anonymous, and your personal information will be protected. Thank you for your participation and support!

**I. Basic Personal Information and General Use of Artificial Intelligence**

1. A. Male B. Female

2. A. First-year postgraduate B. Second-year postgraduate C. Third-year postgraduate

3. A. Arts/Humanities B. Science/Engineering (For interdisciplinary programs, please select the category you consider closest.)

4. The generative AI functions you use (multiple selections allowed):

A. Text generation B. Image generation C. Speech generation D. Video generation E. Information search F. Language translation G. Conversational interaction H. Grammar checking I. Code debugging J. Data analysis K. Other functions L. Never used

5. The reason you first encountered or used generative AI tools:

A. Recommended by teachers/supervisors B. Recommended by classmates C. Recommended by family D. Recommended by friends E. Recommended via WeChat Moments F. Introduced or promoted by online videos or information G. Came across or opened such AI tools by chance

**II. Usage of Generative AI**

**(I) Overall Usage**

6. How do you agree that you are familiar with generative AI?

A. Strongly disagree B. Disagree C. Neutral D. Agree E. Strongly agree

7. You started using AI after the release of DeepSeek:

A. Strongly disagree B. Disagree C. Neutral D. Agree E. Strongly agree

8. You mainly use domestically developed generative AI tools:

A. Strongly disagree B. Disagree C. Neutral D. Agree E. Strongly agree

9. You use generative AI frequently:

A. Strongly disagree B. Disagree C. Neutral D. Agree E. Strongly agree

10. You often learn knowledge or skills related to generative AI:

A. Strongly disagree B. Disagree C. Neutral D. Agree E. Strongly agree

**(II) Course Learning**

11. You use generative AI to answer teachers’ questions in class:

A. Strongly disagree B. Disagree C. Neutral D. Agree E. Strongly agree

12. You use generative AI to assist in completing course assignments:

A. Strongly disagree B. Disagree C. Neutral D. Agree E. Strongly agree

13. You use generative AI to look up information related to course content:

A. Strongly disagree B. Disagree C. Neutral D. Agree E. Strongly agree

14. You ask generative AI to evaluate assignments and provide feedback:

A. Strongly disagree B. Disagree C. Neutral D. Agree E. Strongly agree

**(III) Research Activities**

15. You use generative AI to help me select research topics:

A. Strongly disagree B. Disagree C. Neutral D. Agree E. Strongly agree

16. You use generative AI to assist with academic writing:

A. Strongly disagree B. Disagree C. Neutral D. Agree E. Strongly agree

17. You use generative AI to revise papers or reports:

A. Strongly disagree B. Disagree C. Neutral D. Agree E. Strongly agree

18. You use generative AI to extract key information from academic literature:

A. Strongly disagree B. Disagree C. Neutral D. Agree E. Strongly agree

19. You use generative AI to translate foreign academic articles or materials:

A. Strongly disagree B. Disagree C. Neutral D. Agree E. Strongly agree

**(IV) Daily Life**

20. When encountering difficulties in daily life (e.g., diet, financial management, socializing), you seek help from generative AI:

A. Strongly disagree B. Disagree C. Neutral D. Agree E. Strongly agree

21. You ask generative AI questions about daily knowledge, society, history, geography, culture, etc:

A. Strongly disagree B. Disagree C. Neutral D. Agree E. Strongly agree

22. When bored, you chat and interact with generative AI:

A. Strongly disagree B. Disagree C. Neutral D. Agree E. Strongly agree

23. You ask generative AI to design various forms of entertainment (e.g., riddles, games) to relax:

A. Strongly disagree B. Disagree C. Neutral D. Agree E. Strongly agree

24. You ask generative AI to provide psychological counseling:

A. Strongly disagree B. Disagree C. Neutral D. Agree E. Strongly agree

**(V) Further Study and Job Hunting**

25. You ask generative AI to provide information on suitable further study programs or job positions:

A. Strongly disagree B. Disagree C. Neutral D. Agree E. Strongly agree

26. You ask generative AI to help plan relevant activities:

A. Strongly disagree B. Disagree C. Neutral D. Agree E. Strongly agree

27. You ask generative AI to help create or revise your resume:

A. Strongly disagree B. Disagree C. Neutral D. Agree E. Strongly agree

28. You simulate interviews by interacting with generative AI:

A. Strongly disagree B. Disagree C. Neutral D. Agree E. Strongly agree

**(VI) Effectiveness of Generative AI Tools**

29. Overall, you think the responses provided by generative AI meet your expectations:

A. Strongly disagree B. Disagree C. Neutral D. Agree E. Strongly agree

30. If the responses from generative AI do not meet your expectations, it may be due to insufficient intelligence of the AI tool:

A. Strongly disagree B. Disagree C. Neutral D. Agree E. Strongly agree

31. If the responses from generative AI do not meet your expectations, you will switch to another AI tool:

A. Strongly disagree B. Disagree C. Neutral D. Agree E. Strongly agree

32. If the responses from generative AI do not meet your expectations, it may be due to unclear or incomplete prompts on your part:

A. Strongly disagree B. Disagree C. Neutral D. Agree E. Strongly agree

33. If the responses from generative AI do not meet your expectations, you will adjust prompts to obtain better responses:

A. Strongly disagree B. Disagree C. Neutral D. Agree E. Strongly agree

34. Sometimes even after switching AI tools or adjusting the prompts, you still cannot get satisfactory responses:

A. Strongly disagree B. Disagree C. Neutral D. Agree E. Strongly agree

**III. Application Environment of Generative AI**

35. Your university provides sufficient technical equipment and support (e.g., computers, software, and internet access) for the application of generative AI:

A. Strongly disagree B. Disagree C. Neutral D. Agree E. Strongly agree

36. Your university regularly holds training sessions and lectures on generative AI to help everyone use AI effectively:

A. Strongly disagree B. Disagree C. Neutral D. Agree E. Strongly agree

37. You own digital devices required for using generative AI (computers, smartphones, tablets, etc.):

A. Strongly disagree B. Disagree C. Neutral D. Agree E. Strongly agree

38. You possess the knowledge and skills required to use generative AI effectively:

A. Strongly disagree B. Disagree C. Neutral D. Agree E. Strongly agree

39. Generative AI is compatible with other technologies you currently use:

A. Strongly disagree B. Disagree C. Neutral D. Agree E. Strongly agree

40. When encountering difficulties using generative AI, you can get help from others:

A. Strongly disagree B. Disagree C. Neutral D. Agree E. Strongly agree

41. When encountering difficulties using generative AI, you can access the information needed to solve problems:

A. Strongly disagree B. Disagree C. Neutral D. Agree E. Strongly agree

42. Your brief suggestions on generative AI:
