# Supplementary material
Source: Research Square preprint supplement (doi:10.21203/rs.3.rs-9862747/v1)
Supplement: Supplementary file 2 [file 5c6b98c08ed7ed9f438e50b8.docx]

**Dataset of the Survey on Postgraduates’ Application of Generative Artificial Intelligence**

1. Gender [Single-choice]

| Option | Subtotal | Proportion |
| --- | --- | --- |
| A. Male | 134 | 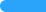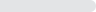32.68% |
| B. Female | 276 | 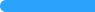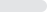67.32% |
| Valid responses for this question | 410 |  |

2. Identity [Single-choice]

| Option | Subtotal | Proportion |
| --- | --- | --- |
| A. First-year postgraduate | 339 | 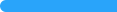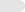82.68% |
| B. Second-year postgraduate | 69 | 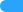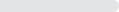16.83% |
| C. Third-year postgraduate | 2 | 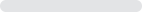0.49% |
| Valid responses for this question | 410 |  |

3. Discipline [Single-choice]

| Option | Subtotal | Proportion |
| --- | --- | --- |
| A. Arts/Humanities | 212 | 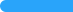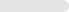51.71% |
| B. Science/Engineering (For interdisciplinary programs, please select the category you consider closest.) | 198 | 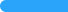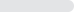48.29% |
| Valid responses for this question | 410 |  |

4. The generative AI functions you use: [Multiple choice]

| Option | Subtotal | Proportion |
| --- | --- | --- |
| A. Text generation | 353 | 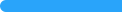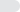86.1% |
| B. Image generation | 96 | 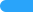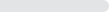23.41% |
| C. Speech generation | 57 | 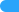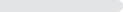13.9% |
| D. Video generation | 42 | 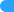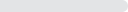10.24% |
| E. Information search | 219 | 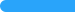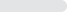53.41% |
| F. Information search | 189 | 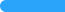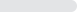46.1% |
| G. Conversational interaction | 119 | 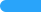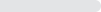29.02% |
| H. Grammar checking | 75 | 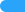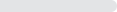18.29% |
| I. Code debugging | 83 | 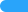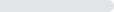20.24% |
| J. Data analysis | 110 | 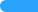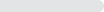26.83% |
| K. Other functions | 17 | 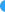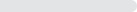4.15% |
| L. Never used | 4 | 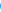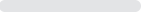0.98% |
| Valid responses for this question | 410 |  |

5. The reason you first encountered or used generative AI tools: [Single-choice]

| Option | Subtotal | Proportion |
| --- | --- | --- |
| A. Recommended by teachers/supervisors | 76 | 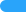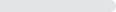18.54% |
| B. Recommended by classmates | 108 | 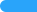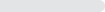26.34% |
| C. Recommended by the family | 8 | 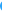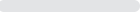1.95% |
| D. Recommended by friends | 32 | 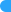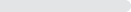7.8% |
| E. Recommended via WeChat Moments | 1 | 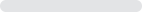0.24% |
| F. Introduced or promoted by online videos or information | 164 | 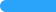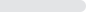40% |
| G. Came across or opened such AI tools by chance | 21 | 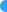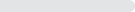5.12% |
| Valid responses for this question | 410 |  |

6. How do you agree that you are familiar with generative AI? [Single-choice]

| Option | Subtotal | Proportion |
| --- | --- | --- |
| A. Strongly disagree | 16 | 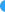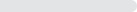3.9% |
| B. Disagree | 85 | 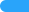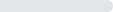20.73% |
| C. Neutral | 192 | 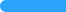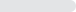46.83% |
| D. Agree | 100 | 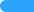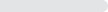24.39% |
| E. Strongly agree | 17 | 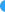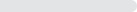4.15% |
| Valid responses for this question | 410 |  |

7. You started using AI after the release of DeepSeek: [Single-choice]

| Option | Subtotal | Proportion |
| --- | --- | --- |
| A. Strongly disagree | 158 | 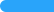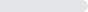38.54% |
| B. Disagree | 146 | 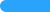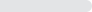35.61% |
| C. Neutral | 59 | 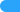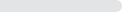14.39% |
| D. Agree | 32 | 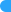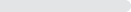7.8% |
| E. Strongly agree | 15 | 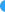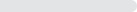3.66% |
| Valid responses for this question | 410 |  |

8. You mainly use domestically developed generative AI tools: [Single-choice]

| Option | Subtotal | Proportion |
| --- | --- | --- |
| A. Strongly disagree | 21 | 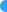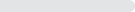5.12% |
| B. Disagree | 52 | 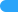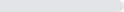12.68% |
| C. Neutral | 155 | 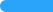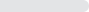37.8% |
| D. Agree | 109 | 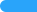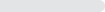26.59% |
| E. Strongly agree | 73 | 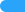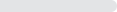17.8% |
| Valid responses for this question | 410 |  |

9. You use generative AI frequently: [Single-choice]

| Option | Subtotal | Proportion |
| --- | --- | --- |
| A. Strongly disagree | 11 | 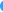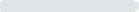2.68% |
| B. Disagree | 75 | 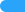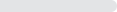18.29% |
| C. Neutral | 167 | 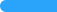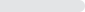40.73% |
| D. Agree | 90 | 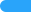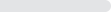21.95% |
| E. Strongly agree | 67 | 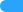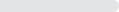16.34% |
| Valid responses for this question | 410 |  |

10. You often learn knowledge or skills related to generative AI: [Single-choice]

| Option | Subtotal | Proportion |
| --- | --- | --- |
| A. Strongly disagree | 16 | 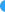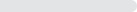3.9% |
| B. Disagree | 122 | 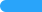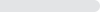29.76% |
| C. Neutral | 160 | 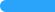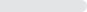39.02% |
| D. Agree | 77 | 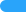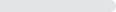18.78% |
| E. Strongly agree | 35 | 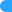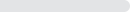8.54% |
| Valid responses for this question | 410 |  |

11. You use generative AI to answer teachers’ questions in class: [Single-choice]

| Option | Subtotal | Proportion |
| --- | --- | --- |
| A. Strongly disagree | 21 | 5.12% |
| B. Disagree | 117 | 28.54% |
| C. Neutral | 147 | 35.85% |
| D. Agree | 89 | 21.71% |
| E. Strongly agree | 36 | 8.78% |
| Valid responses for this question | 410 |  |

12. You use generative AI to assist in completing course assignments: [Single-choice]

| Option | Subtotal | Proportion |
| --- | --- | --- |
| A. Strongly disagree | 12 | 2.93% |
| B. Disagree | 72 | 17.56% |
| C. Neutral | 171 | 41.71% |
| D. Agree | 107 | 26.1% |
| E. Strongly agree | 48 | 11.71% |
| Valid responses for this question | 410 |  |

13. You use generative AI to look up information related to course content: [Single-choice]

| Option | Subtotal | Proportion |
| --- | --- | --- |
| A. Strongly disagree | 9 | 2.2% |
| B. Disagree | 37 | 9.02% |
| C. Neutral | 168 | 40.98% |
| D. Agree | 130 | 31.71% |
| E. Strongly agree | 66 | 16.1% |
| Valid responses for this question | 410 |  |

14. You ask generative AI to evaluate assignments and provide feedback: [Single-choice]

| Option | Subtotal | Proportion |
| --- | --- | --- |
| A. Strongly disagree | 21 | 5.12% |
| B. Disagree | 110 | 26.83% |
| C. Neutral | 147 | 35.85% |
| D. Agree | 93 | 22.68% |
| E. Strongly agree | 39 | 9.51% |
| Valid responses for this question | 410 |  |

15. You use generative AI to help me select research topics: [Single-choice]

| Option | Subtotal | Proportion |
| --- | --- | --- |
| A. Strongly disagree | 11 | 2.68% |
| B. Disagree | 68 | 16.59% |
| C. Neutral | 166 | 40.49% |
| D. Agree | 104 | 25.37% |
| E. Strongly agree | 61 | 14.88% |
| Valid responses for this question | 410 |  |

16. You use generative AI to assist with academic writing: [Single-choice]

| Option | Subtotal | Proportion |
| --- | --- | --- |
| A. Strongly disagree | 9 | 2.2% |
| B. Disagree | 62 | 15.12% |
| C. Neutral | 170 | 41.46% |
| D. Agree | 117 | 28.54% |
| E. Strongly agree | 52 | 12.68% |
| Valid responses for this question | 410 |  |

17. You use generative AI to revise papers or reports: [Single-choice]

| Option | Subtotal | Proportion |
| --- | --- | --- |
| A. Strongly disagree | 19 | 4.63% |
| B. Disagree | 82 | 20% |
| C. Neutral | 168 | 40.98% |
| D. Agree | 93 | 22.68% |
| E. Strongly agree | 48 | 11.71% |
| Valid responses for this question | 410 |  |

18. You use generative AI to extract key information from academic literature: [Single-choice]

| Option | Subtotal | Proportion |
| --- | --- | --- |
| A. Strongly disagree | 6 | 1.46% |
| B. Disagree | 52 | 12.68% |
| C. Neutral | 169 | 41.22% |
| D. Agree | 127 | 30.98% |
| E. Strongly agree | 56 | 13.66% |
| Valid responses for this question | 410 |  |

19. You use generative AI to translate foreign academic articles or materials: [Single-choice]

| Option | Subtotal | Proportion |
| --- | --- | --- |
| A. Strongly disagree | 8 | 1.95% |
| B. Disagree | 62 | 15.12% |
| C. Neutral | 159 | 38.78% |
| D. Agree | 113 | 27.56% |
| E. Strongly agree | 68 | 16.59% |
| Valid responses for this question | 410 |  |

20. When encountering difficulties in daily life (e.g., diet, financial management, socializing), you seek help from generative AI: [Single-choice]

| Option | Subtotal | Proportion |
| --- | --- | --- |
| A. Strongly disagree | 46 | 11.22% |
| B. Disagree | 119 | 29.02% |
| C. Neutral | 127 | 30.98% |
| D. Agree | 81 | 19.76% |
| E. Strongly agree | 37 | 9.02% |
| Valid responses for this question | 410 |  |

21. You ask generative AI questions about daily knowledge, society, history, geography, culture, etc: [Single-choice]

| Option | Subtotal | Proportion |
| --- | --- | --- |
| A. Strongly disagree | 27 | 6.59% |
| B. Disagree | 65 | 15.85% |
| C. Neutral | 160 | 39.02% |
| D. Agree | 112 | 27.32% |
| E. Strongly agree | 46 | 11.22% |
| Valid responses for this question | 410 |  |

22. When bored, you chat and interact with generative AI: [Single-choice]

| Option | Subtotal | Proportion |
| --- | --- | --- |
| A. Strongly disagree | 109 | 26.59% |
| B. Disagree | 149 | 36.34% |
| C. Neutral | 77 | 18.78% |
| D. Agree | 53 | 12.93% |
| E. Strongly agree | 22 | 5.37% |
| Valid responses for this question | 410 |  |

23. You ask generative AI to design various forms of entertainment (e.g., riddles, games) to relax: [Single-choice]

| Option | Subtotal | Proportion |
| --- | --- | --- |
| A. Strongly disagree | 115 | 28.05% |
| B. Disagree | 164 | 40% |
| C. Neutral | 73 | 17.8% |
| D. Agree | 40 | 9.76% |
| E. Strongly agree | 18 | 4.39% |
| Valid responses for this question | 410 |  |

24. You ask generative AI to provide psychological counseling: [Single-choice]

| Option | Subtotal | Proportion |
| --- | --- | --- |
| A. Strongly disagree | 137 | 33.41% |
| B. Disagree | 139 | 33.9% |
| C. Neutral | 79 | 19.27% |
| D. Agree | 38 | 9.27% |
| E. Strongly agree | 17 | 4.15% |
| Valid responses for this question | 410 |  |

25. You ask generative AI to provide information on suitable further study programs or job positions: [Single-choice]

| Option | Subtotal | Proportion |
| --- | --- | --- |
| A. Strongly disagree | 84 | 20.49% |
| B. Disagree | 152 | 37.07% |
| C. Neutral | 109 | 26.59% |
| D. Agree | 49 | 11.95% |
| E. Strongly agree | 16 | 3.9% |
| Valid responses for this question | 410 |  |

26. You ask generative AI to help plan relevant activities: [Single-choice]

| Option | Subtotal | Proportion |
| --- | --- | --- |
| A. Strongly disagree | 60 | 14.63% |
| B. Disagree | 103 | 25.12% |
| C. Neutral | 142 | 34.63% |
| D. Agree | 79 | 19.27% |
| E. Strongly agree | 26 | 6.34% |
| Valid responses for this question | 410 |  |

27. You ask generative AI to help create or revise your resume: [Single-choice]

| Option | Subtotal | Proportion |
| --- | --- | --- |
| A. Strongly disagree | 61 | 14.88% |
| B. Disagree | 109 | 26.59% |
| C. Neutral | 145 | 35.37% |
| D. Agree | 72 | 17.56% |
| E. Strongly agree | 23 | 5.61% |
| Valid responses for this question | 410 |  |

28. You simulate interviews by interacting with generative AI: [Single-choice]

| Option | Subtotal | Proportion |
| --- | --- | --- |
| A. Strongly disagree | 107 | 26.1% |
| B. Disagree | 160 | 39.02% |
| C. Neutral | 90 | 21.95% |
| D. Agree | 38 | 9.27% |
| E. Strongly agree | 15 | 3.66% |
| Valid responses for this question | 410 |  |

29. Overall, you think the responses provided by generative AI meet your expectations: [Single-choice]

| Option | Subtotal | Proportion |
| --- | --- | --- |
| A. Strongly disagree | 13 | 3.17% |
| B. Disagree | 76 | 18.54% |
| C. Neutral | 220 | 53.66% |
| D. Agree | 79 | 19.27% |
| E. Strongly agree | 22 | 5.37% |
| Valid responses for this question | 410 |  |

30. If the responses from generative AI do not meet your expectations, it may be due to insufficient intelligence of the AI tool: [Single-choice]

| Option | Subtotal | Proportion |
| --- | --- | --- |
| A. Strongly disagree | 13 | 3.17% |
| B. Disagree | 78 | 19.02% |
| C. Neutral | 173 | 42.2% |
| D. Agree | 100 | 24.39% |
| E. Strongly agree | 46 | 11.22% |
| Valid responses for this question | 410 |  |

31. If the responses from generative AI do not meet your expectations, you will switch to another AI tool: [Single-choice]

| Option | Subtotal | Proportion |
| --- | --- | --- |
| A. Strongly disagree | 15 | 3.66% |
| B. Disagree | 60 | 14.63% |
| C. Neutral | 174 | 42.44% |
| D. Agree | 102 | 24.88% |
| E. Strongly agree | 59 | 14.39% |
| Valid responses for this question | 410 |  |

32. If the responses from generative AI do not meet your expectations, it may be due to unclear or incomplete prompts on your part: [Single-choice]

| Option | Subtotal | Proportion |
| --- | --- | --- |
| A. Strongly disagree | 11 | 2.68% |
| B. Disagree | 56 | 13.66% |
| C. Neutral | 187 | 45.61% |
| D. Agree | 117 | 28.54% |
| E. Strongly agree | 39 | 9.51% |
| Valid responses for this question | 410 |  |

33. If the responses from generative AI do not meet your expectations, you will adjust prompts to obtain better responses: [Single-choice]

| Option | Subtotal | Proportion |
| --- | --- | --- |
| A. Strongly disagree | 9 | 2.2% |
| B. Disagree | 31 | 7.56% |
| C. Neutral | 179 | 43.66% |
| D. Agree | 129 | 31.46% |
| E. Strongly agree | 62 | 15.12% |
| Valid responses for this question | 410 |  |

34. Sometimes even after switching AI tools or adjusting the prompts, you still cannot get satisfactory responses: [Single-choice]

| Option | Subtotal | Proportion |
| --- | --- | --- |
| A. Strongly disagree | 11 | 2.68% |
| B. Disagree | 70 | 17.07% |
| C. Neutral | 167 | 40.73% |
| D. Agree | 125 | 30.49% |
| E. Strongly agree | 37 | 9.02% |
| Valid responses for this question | 410 |  |

35. Your university provides sufficient technical equipment and support (e.g., computers, software, and internet access) for the application of generative AI: [Single-choice]

| Option | Subtotal | Proportion |
| --- | --- | --- |
| A. Strongly disagree | 24 | 5.85% |
| B. Disagree | 87 | 21.22% |
| C. Neutral | 165 | 40.24% |
| D. Agree | 101 | 24.63% |
| E. Strongly agree | 33 | 8.05% |
| Valid responses for this question | 410 |  |

36. Your university regularly holds training sessions and lectures on generative AI to help everyone use AI effectively: [Single-choice]

| Option | Subtotal | Proportion |
| --- | --- | --- |
| A. Strongly disagree | 42 | 10.24% |
| B. Disagree | 120 | 29.27% |
| C. Neutral | 145 | 35.37% |
| D. Agree | 80 | 19.51% |
| E. Strongly agree | 23 | 5.61% |
| Valid responses for this question | 410 |  |

37. You own digital devices required for using generative AI (computers, smartphones, tablets, etc.): [Single-choice]

| Option | Subtotal | Proportion |
| --- | --- | --- |
| A. Strongly disagree | 8 | 1.95% |
| B. Disagree | 24 | 5.85% |
| C. Neutral | 134 | 32.68% |
| D. Agree | 135 | 32.93% |
| E. Strongly agree | 109 | 26.59% |
| Valid responses for this question | 410 |  |

38. You possess the knowledge and skills required to use generative AI effectively: [Single-choice]

| Option | Subtotal | Proportion |
| --- | --- | --- |
| A. Strongly disagree | 10 | 2.44% |
| B. Disagree | 77 | 18.78% |
| C. Neutral | 190 | 46.34% |
| D. Agree | 101 | 24.63% |
| E. Strongly agree | 32 | 7.8% |
| Valid responses for this question | 410 |  |

39. Generative AI is compatible with other technologies you currently use: [Single-choice]

| Option | Subtotal | Proportion |
| --- | --- | --- |
| A. Strongly disagree | 10 | 2.44% |
| B. Disagree | 61 | 14.88% |
| C. Neutral | 194 | 47.32% |
| D. Agree | 111 | 27.07% |
| E. Strongly agree | 34 | 8.29% |
| Valid responses for this question | 410 |  |

40. When encountering difficulties using generative AI, you can get help from others: [Single-choice]

| Option | Subtotal | Proportion |
| --- | --- | --- |
| A. Strongly disagree | 9 | 2.2% |
| B. Disagree | 80 | 19.51% |
| C. Neutral | 179 | 43.66% |
| D. Agree | 111 | 27.07% |
| E. Strongly agree | 31 | 7.56% |
| Valid responses for this question | 410 |  |

41. When encountering difficulties using generative AI, you can access the information needed to solve problems: [Single-choice]

| Option | Subtotal | Proportion |
| --- | --- | --- |
| A. Strongly disagree | 8 | 1.95% |
| B. Disagree | 72 | 17.56% |
| C. Neutral | 188 | 45.85% |
| D. Agree | 111 | 27.07% |
| E. Strongly agree | 31 | 7.56% |
| Valid responses for this question | 410 |  |

42. Your brief suggestions on generative AI:

Note: This data of suggestions can be found in the file of “Original Source Data”.
